# Supplementary material for: Plasma-free metal-assisted chemical etching producing three-dimensional gallium nitride structures
Source: Royal Society of Chemistry journal article supplement (doi:10.1039/d3tc02731g), 2023-01-01
Supplement: d3tc02731g1.pdf [file d3tc02731g1.pdf]

Supporting information

# **Plasma-free      Metal-assisted      Chemical Etching      Producing      Three-dimensional Gallium Nitride Structures**

Yikai Liao, You Jin Kim, Shu An and Munho Kim\*

<sup>1</sup>School of Electrical and Electronic Engineering, Nanyang Technological University,  
50 Nanyang Avenue, Singapore 639798

\*Authors to who correspondence should be addressed:

[munho.kim@ntu.edu.sg](mailto:munho.kim@ntu.edu.sg)

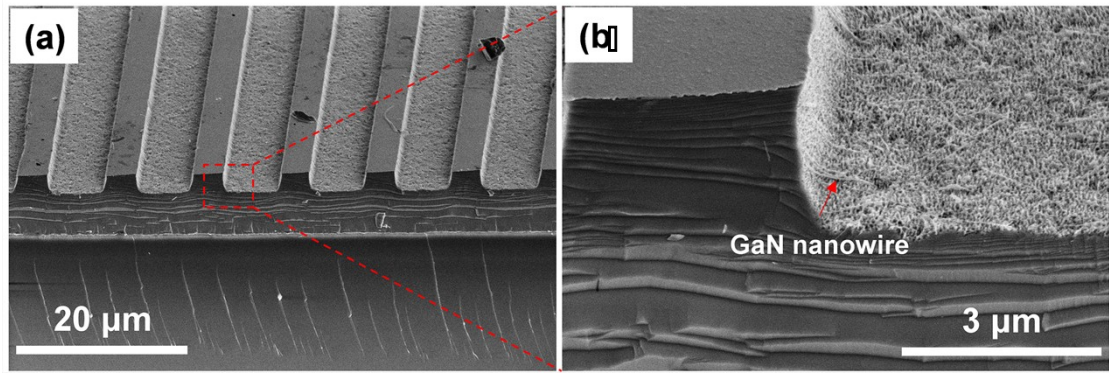

**Figure S1.** (a) 45°tilted SEM images of GaN trench array taken at cross-section. (b) Zoom-in SEM images corresponding to red outlined region of (a).

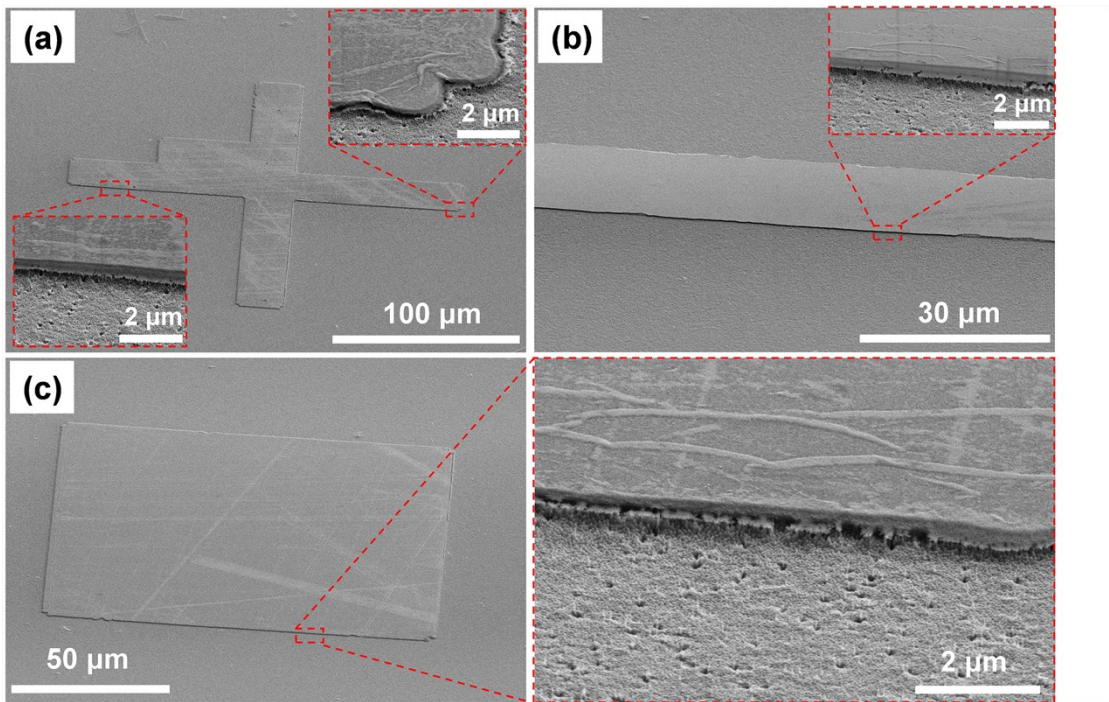

**Figure S2.** 45°tilted SEM images of vertical GaN structures after 30 min MacEtch with Pt patterns of (a) cross, (b) isolated strip, and (c) rectangular pad. Insets show the zoom-in images at outlined areas.

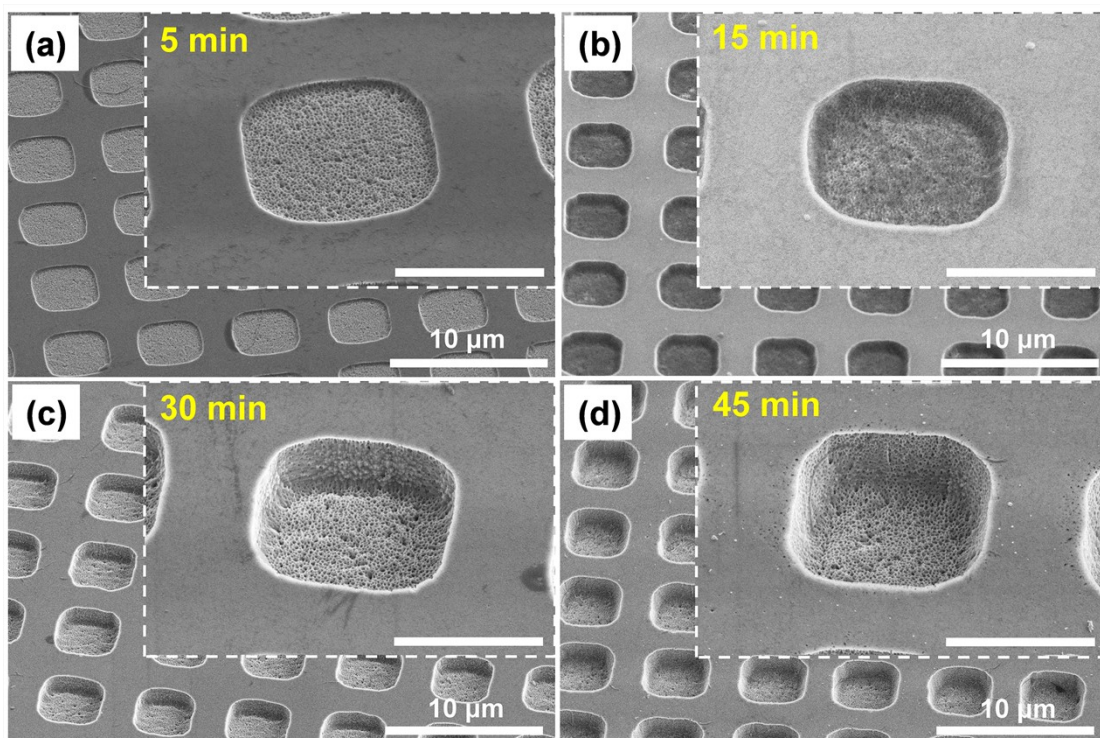

**Figure S3.** 45° tilted SEM images of GaN hole array obtained from MacEtch of (a) 5 min, (b) 15 min, (c) 30 min and (d) 45 min. Insets show the individual hole with a scale bar of 3 μm.

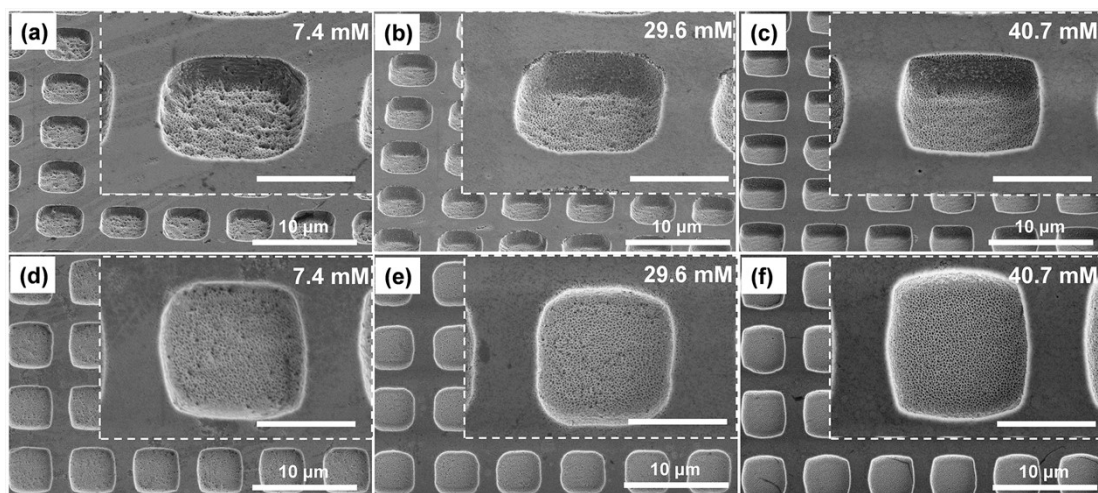

**Figure S4.** 45° tilted and top view SEM images of GaN hole array obtained from 30 min MacEtch with  $K_2S_2O_8$  concentration of (a, d) 7.4 mM, (b, e) 29.6 mM, and (c, f) 40.7 mM respectively. Insets of (a-f) show the individual GaN hole with a scale bar of 3 μm. HF concentration was fixed at 14 M.



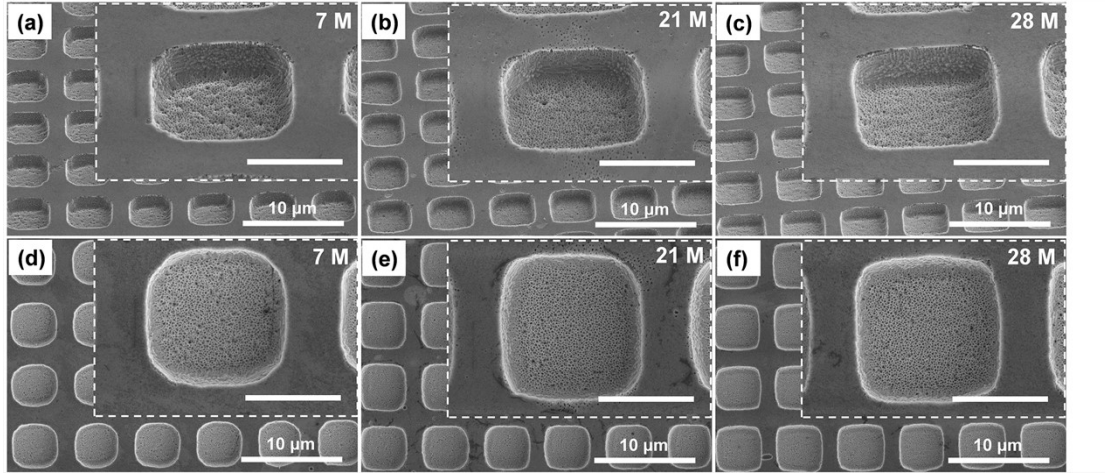

**Figure S5.** 45° tilted and top view SEM images of GaN hole array obtained from 30 min MacEtch with HF concentration of (a, d) 7 M, (b, e) 21 M, and (c, f) 28 M respectively. Insets of (a-f) show the individual GaN hole with a scale bar of 3  $\mu\text{m}$ .  $\text{K}_2\text{S}_2\text{O}_8$  concentration was fixed at 18.0 mM.

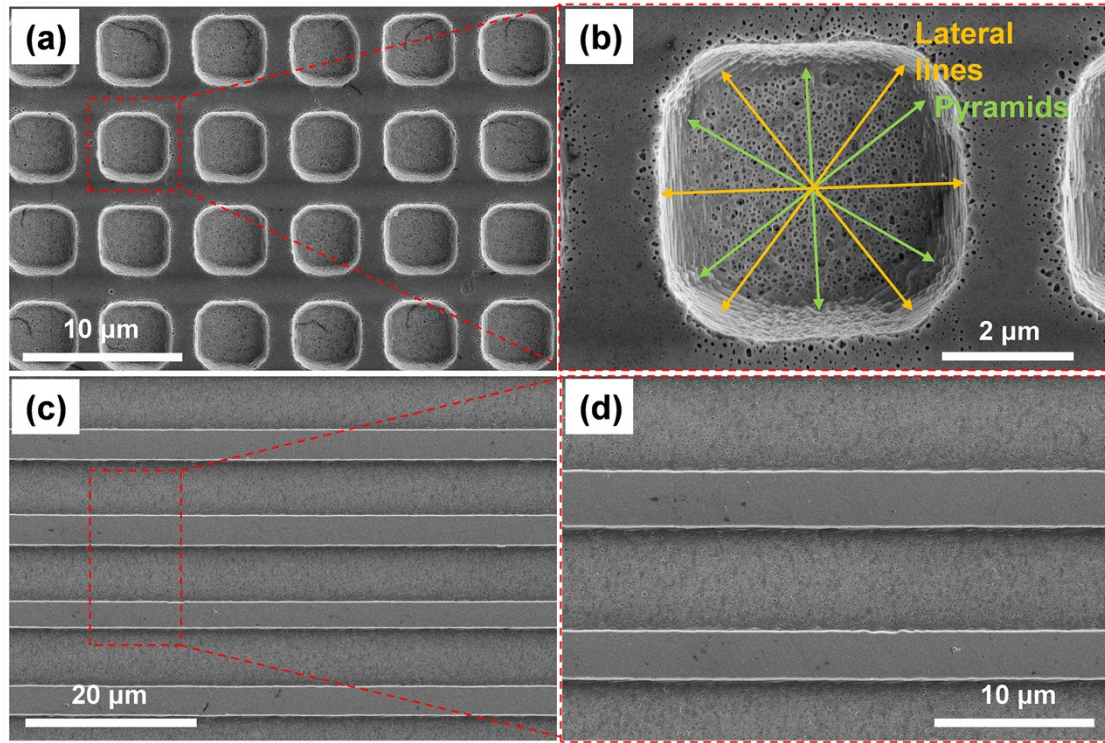

**Figure S6.** Top view SEM images of (a) GaN hole array and (c) GaN trench array after 3 min KOH smoothing. (b) and (d) show the zoom-in SEM images at etching front of (a) and (c), respectively. Orange and green arrows in (b) indicate the position of lateral lines and pyramid clusters.

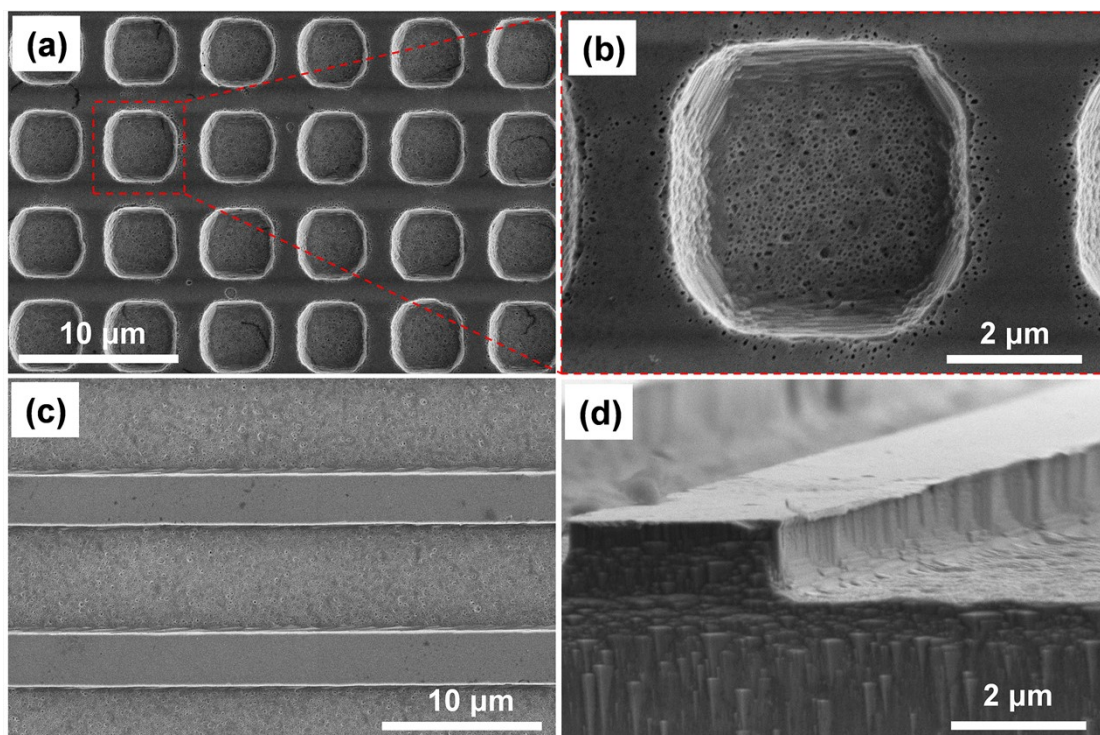

**Figure S7.** Top view SEM images of (a) GaN hole array and (c, d) GaN trench array after 6 min KOH smoothing. (b) shows the zoom-in SEM image at etching front of (a).

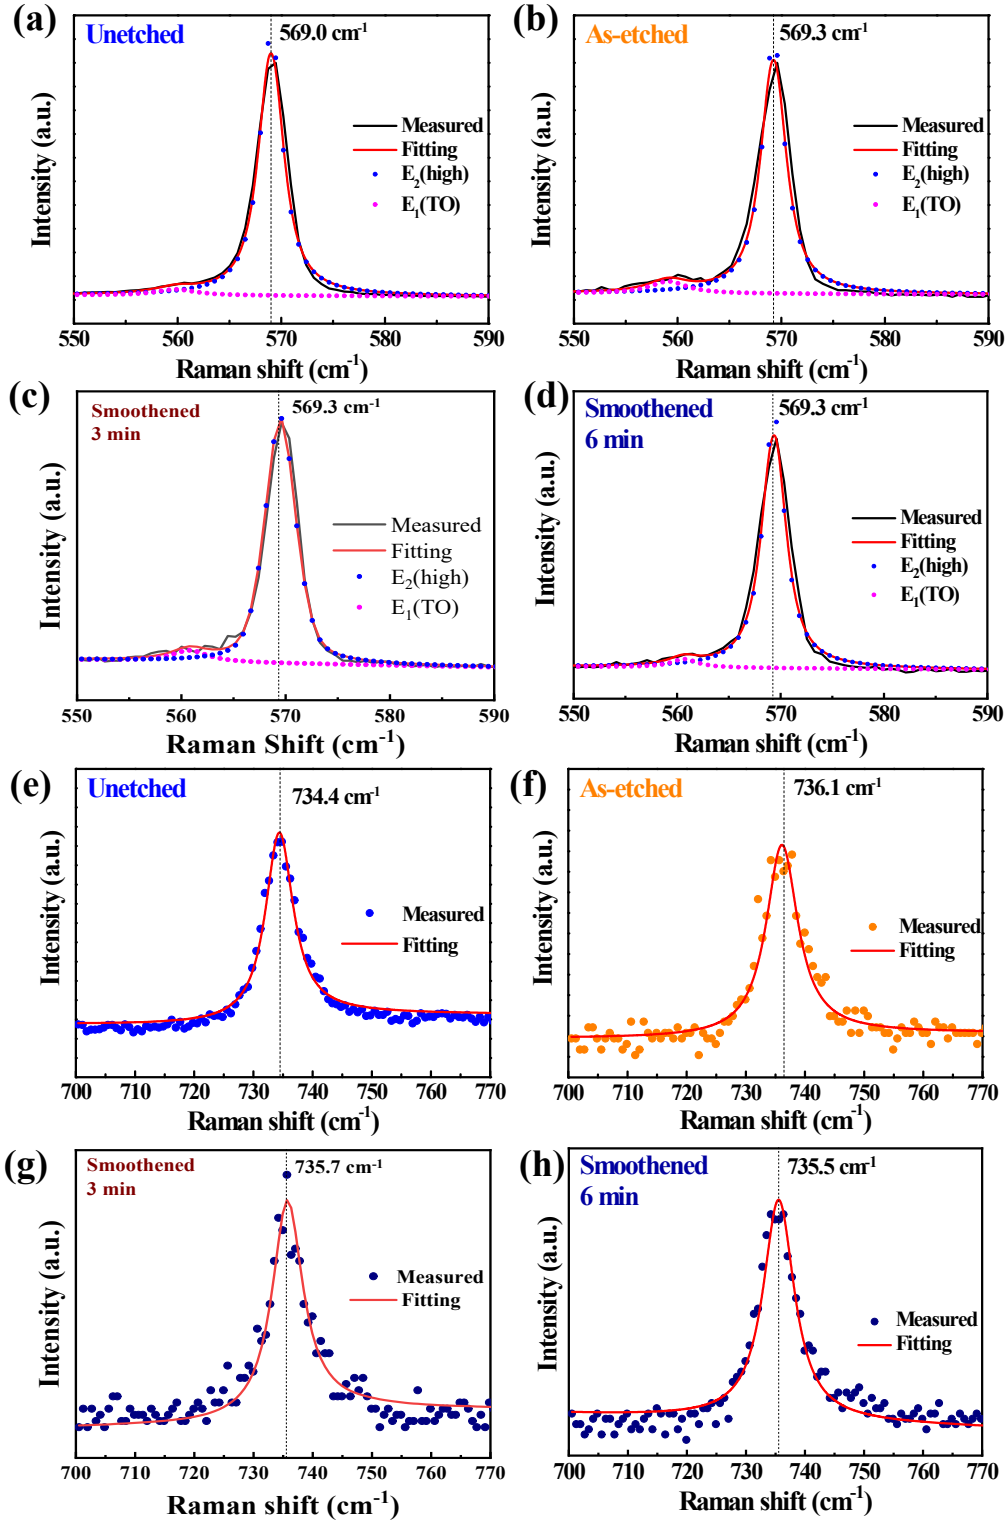

**Figure S8.** Lorentz fitting of Raman peak of (a, e) unetched, (b, f) as-etched, and (c, g) 3 min smoothed samples and (d, h) 6 min smoothed samples with spectra (a-d) from 550 ~ 590 cm<sup>-1</sup> and (e-h) from 700 ~ 770 cm<sup>-1</sup>.
